# Supplementary material for: Host–Guest Interactions of Zirconium-Based Metal–Organic Framework with Ionic Liquid
Source: MDPI journal article supplement (doi:10.3390/molecules28062833), 2023-03-21
Supplement: s1 [file s1]

# Host-Guest Interactions of Zirconium-based Metal-Organic Framework with Ionic Liquid

Mohd. Faridzuan Majid <sup>1,2</sup>, Hayyiratul Fatimah Mohd Zaid <sup>2,3,\*</sup>, Muhammad Fadhlullah Abd Shukur <sup>1,2</sup>, Azizan Ahmad <sup>4,5</sup> and Khairulazhar Jumbri <sup>1,6</sup>

<sup>1</sup> Department of Fundamental and Applied Sciences, Universiti Teknologi PETRONAS, 32610 Seri Iskandar, Perak Darul Ridzuan, Malaysia; mohd.\_17006281@utp.edu.my (M.F.M.); mfadhlullah.ashukur@utp.edu.my (M.F.A.S.); khairulazhar.jumbri@utp.edu.my (K.J.)

<sup>2</sup> Centre of Innovative Nanostructures & Nanodevices (COINN), Universiti Teknologi PETRONAS, 32610 Seri Iskandar, Perak Darul Ridzuan, Malaysia

<sup>3</sup> Chemical Engineering Department, Universiti Teknologi PETRONAS, 32610 Seri Iskandar, Perak, Malaysia

<sup>4</sup> Department of Chemical Sciences, Universiti Kebangsaan Malaysia, 43600 Bangi, Selangor, Malaysia; mfadhlullah.ashukur@utp.edu.my

<sup>5</sup> Department of Physics, Faculty of Science and Technology, Airlangga University (Campus C), Mulyorejo Road, Surabaya 60115, Indonesia

<sup>6</sup> Centre for Research in Ionic Liquids (CORIL), Universiti Teknologi PETRONAS, 32610 Seri Iskandar, Perak Darul Ridzuan, Malaysia

\* Correspondence: hayyiratul.mzaid@utp.edu.my; Tel.: +605-3687618

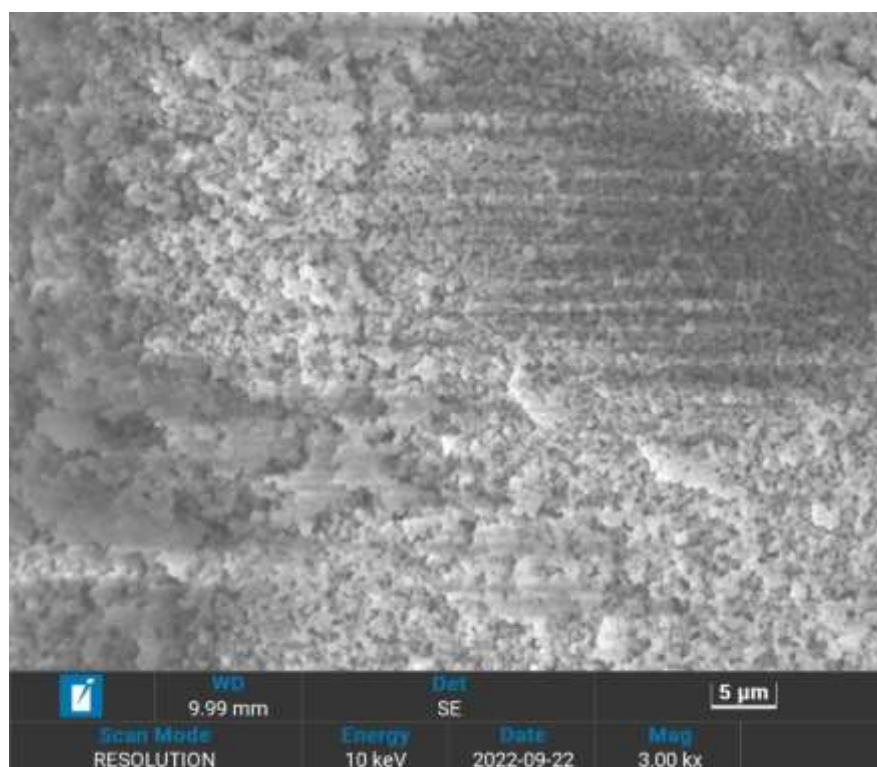

Figure S1. The surface of pristine UiO-66 at 5 μm.

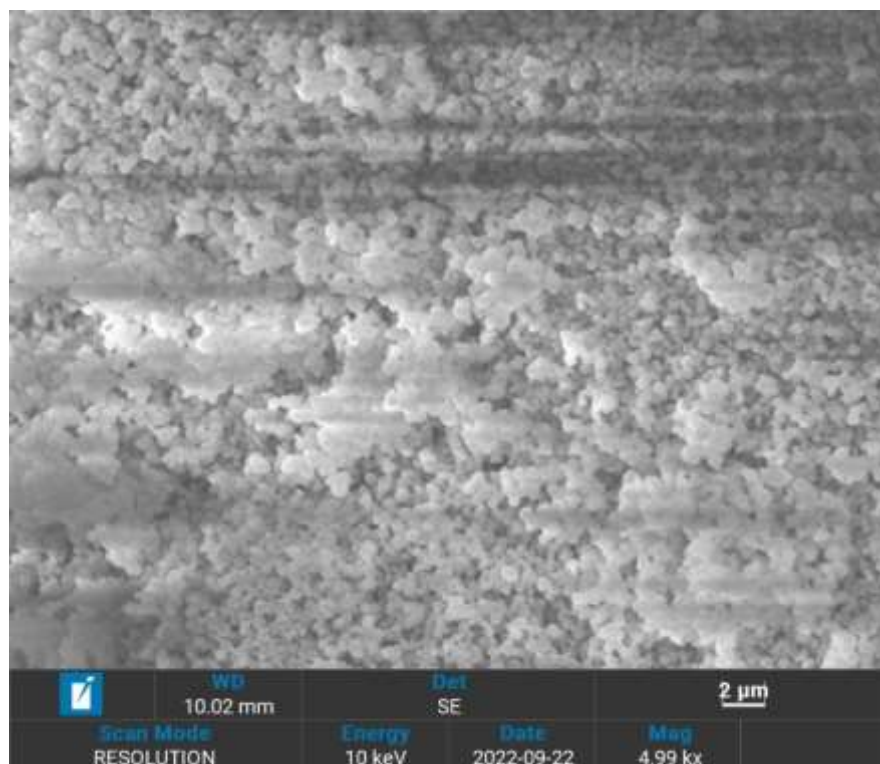

**Figure S2.** The surface of pristine UiO-66 at 2 μm.

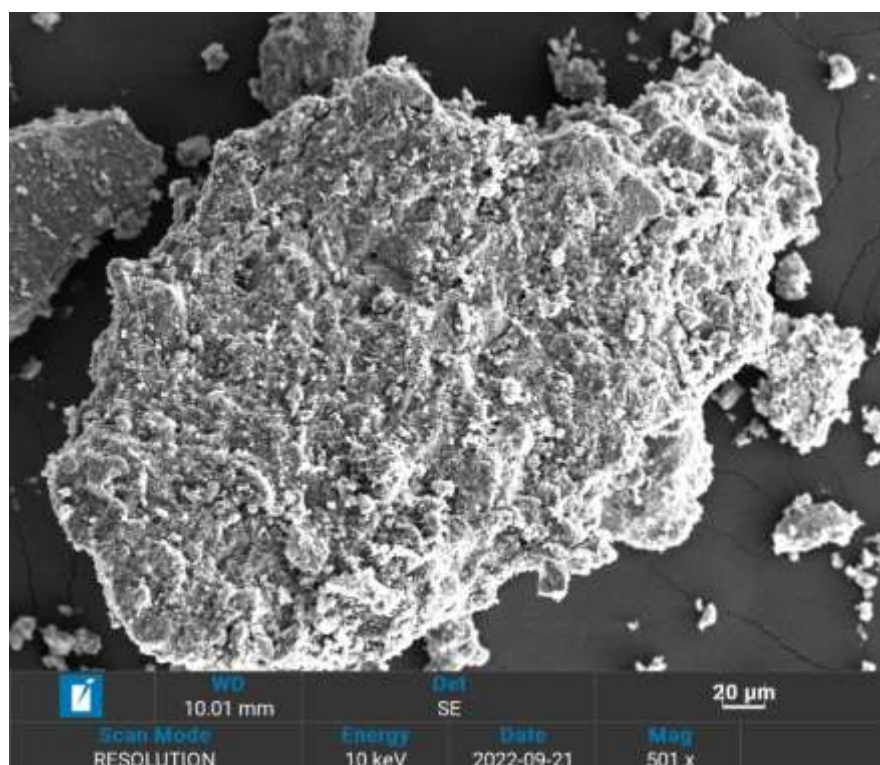

**Figure S3.** The surface UiO-66@IL at 20 μm.

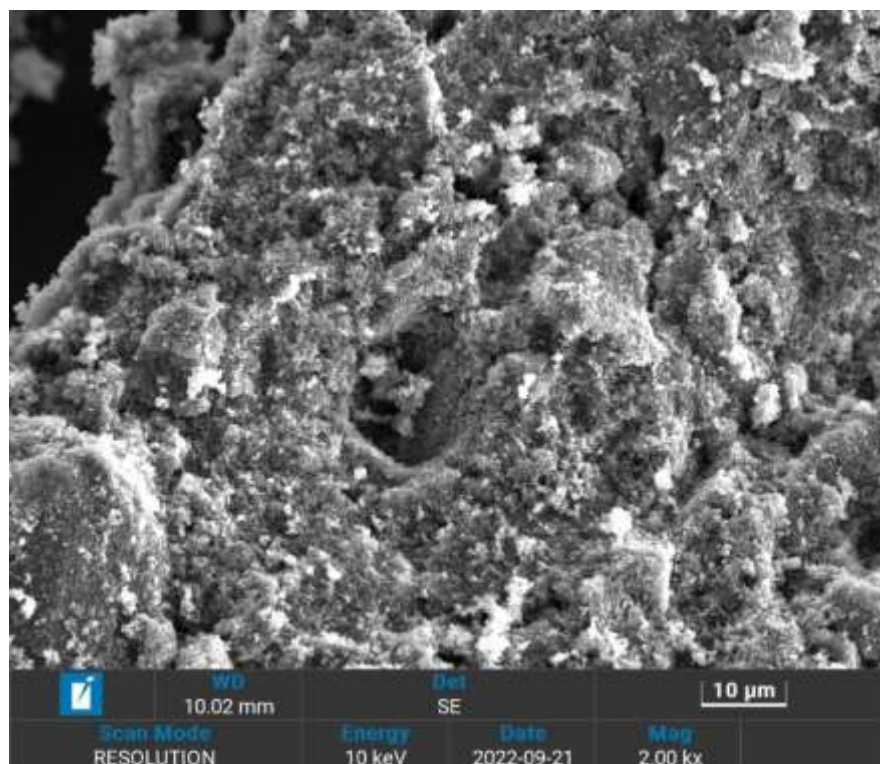

**Figure S4.** The surface of UiO-66@IL at 10 μm.
